# Supplementary material for: Competition between microtubule-associated proteins directs motor transport
Source: PubMed Central journal article supplement (PMC5902456; doi:10.1038/s41467-018-03909-2), 2018-04-16
Supplement: 41467_2018_3909_MOESM1_ESM.pdf [file 41467_2018_3909_MOESM1_ESM.pdf]

**Competition between microtubule-associated proteins directs motor transport**

**Monroy *et al.***

**Supplementary Figures and Figure Legends**

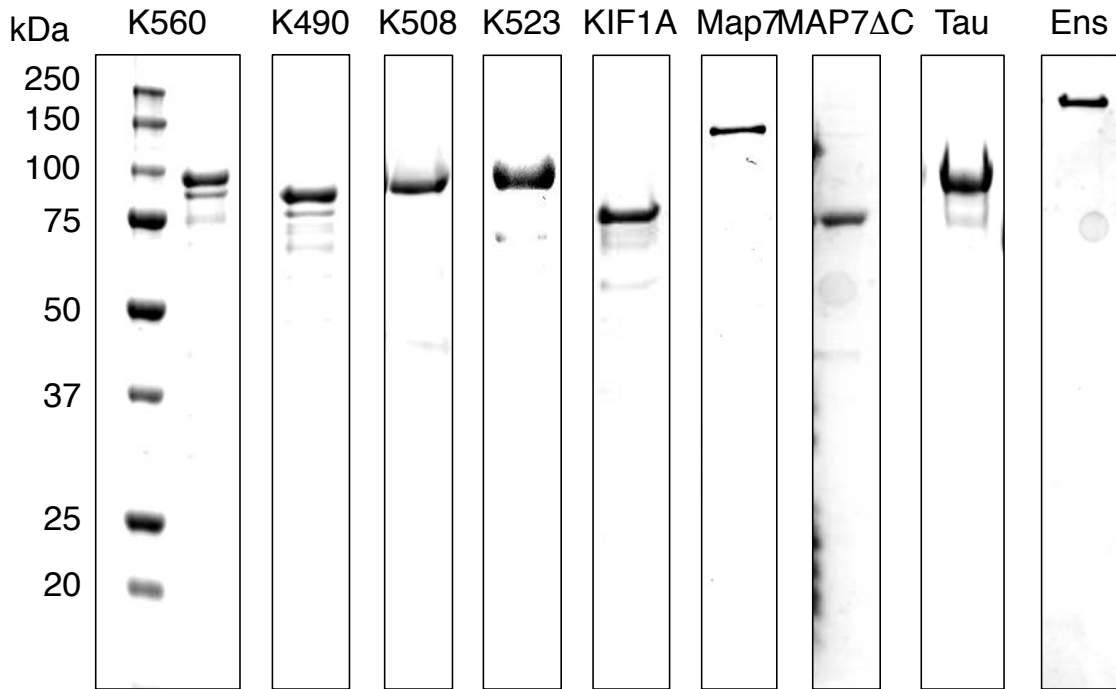

**Supplementary Figure 1. Purified recombinant proteins used in this study.**

Coomassie Blue-stained SDS-PAGE gels of K560-mScarlet, K490-mScarlet, K508-mScarlet, K523-mScarlet, KIF1A-mScarlet, sfGFP-MAP7, sfGFP-MAP7ΔC, mTagBFP-tau, and sfGFP-ensconsin.

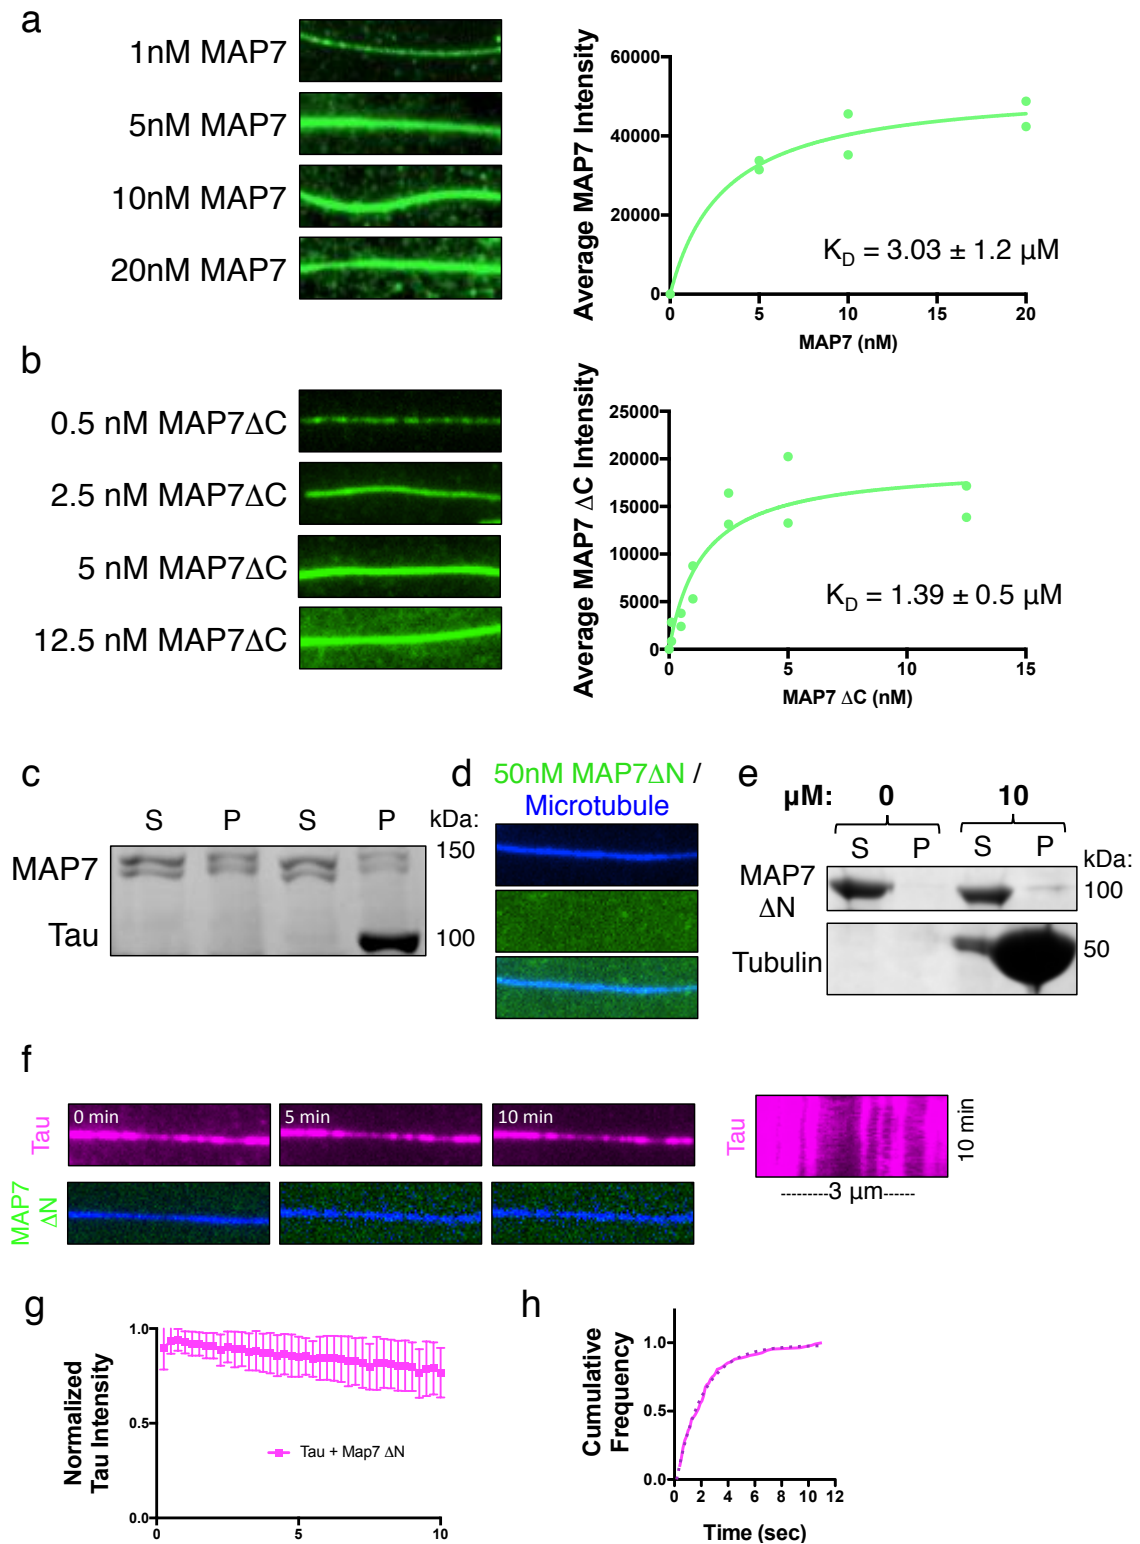

**Supplementary Figure 2. Analysis of MAP7 and tau competition on the microtubule lattice.**

**(a-b)** Fluorescence images of either full-length sfGFP-MAP7 **(a)** or sfGFP-MAP7 $\Delta$ C **(b)** bound to microtubules, and corresponding quantification of fluorescence intensity of microtubule-bound sfGFP-MAP7 or sfGFP-MAP7 $\Delta$ C plotted against concentration (full-length MAP7:  $K_D \pm \text{s.d.} = 3.03 \pm 1.2$ ;  $n = 48, 21, 48, 44,$  and  $49$  microtubules for  $0 \text{ nM}, 1 \text{ nM}, 5 \text{ nM}, 10 \text{ nM},$  and  $20 \text{ nM}$  concentrations, respectively from three independent trials; MAP7 $\Delta$ C  $K_D \pm \text{s.d.} = 1.39 \pm 0.5$ ;  $n = 24$  microtubules for each concentration  $0 \text{ nM}, 0.1 \text{ nM}, 0.5 \text{ nM}, 1 \text{ nM}, 2.5 \text{ nM}, 5 \text{ nM}, 12.5 \text{ nM},$  from two independent trials;  $P = 0.177$ ). **(c)** Coomassie-Blue stained SDS-PAGE gel of GFP binding protein (GBP) pull-down with purified recombinant proteins.  $500 \text{ nM}$  sfGFP-tau was used for pull-down assays with  $250 \text{ nM}$  TagRFP-MAP7, ( $n =$  three independent trials). S = supernatant and P = pellet. **(d)** Fluorescence images of sfGFP-MAP7 $\Delta$ N not bound to the microtubule. Images are  $3.1 \mu\text{m}$ . **(e)** Coomassie-Blue stained SDS-PAGE gel of  $500 \text{ nM}$  MAP7 $\Delta$ N in the absence or presence of taxol-stabilized microtubules. S = supernatant and P = pellet. **(f)** Successive movie frames of mScarlet-tau in the presence of sfGFP-MAP7 $\Delta$ N. Images are  $3.1 \mu\text{m}$ . The corresponding kymograph to the right depicts tau over  $10 \text{ min}$  (images were acquired at  $15 \text{ s}$  intervals). **(g)** Quantification of tau fluorescence intensity in the presence of MAP7 $\Delta$ N over  $10 \text{ min}$  ( $n = 14$  microtubules from two independent trials). **(h)** Adjusted scale graph depicting the cumulative frequency of tau (decay constant,  $\tau = 1.9 \pm 0.1 \text{ s}$ ;  $n = 142$  events from  $n = 16$  microtubules from two independent trials) dwell times fit to a one phase exponential decay ( $R^2 = 0.995$  for tau  $P < 0.0001$ ).

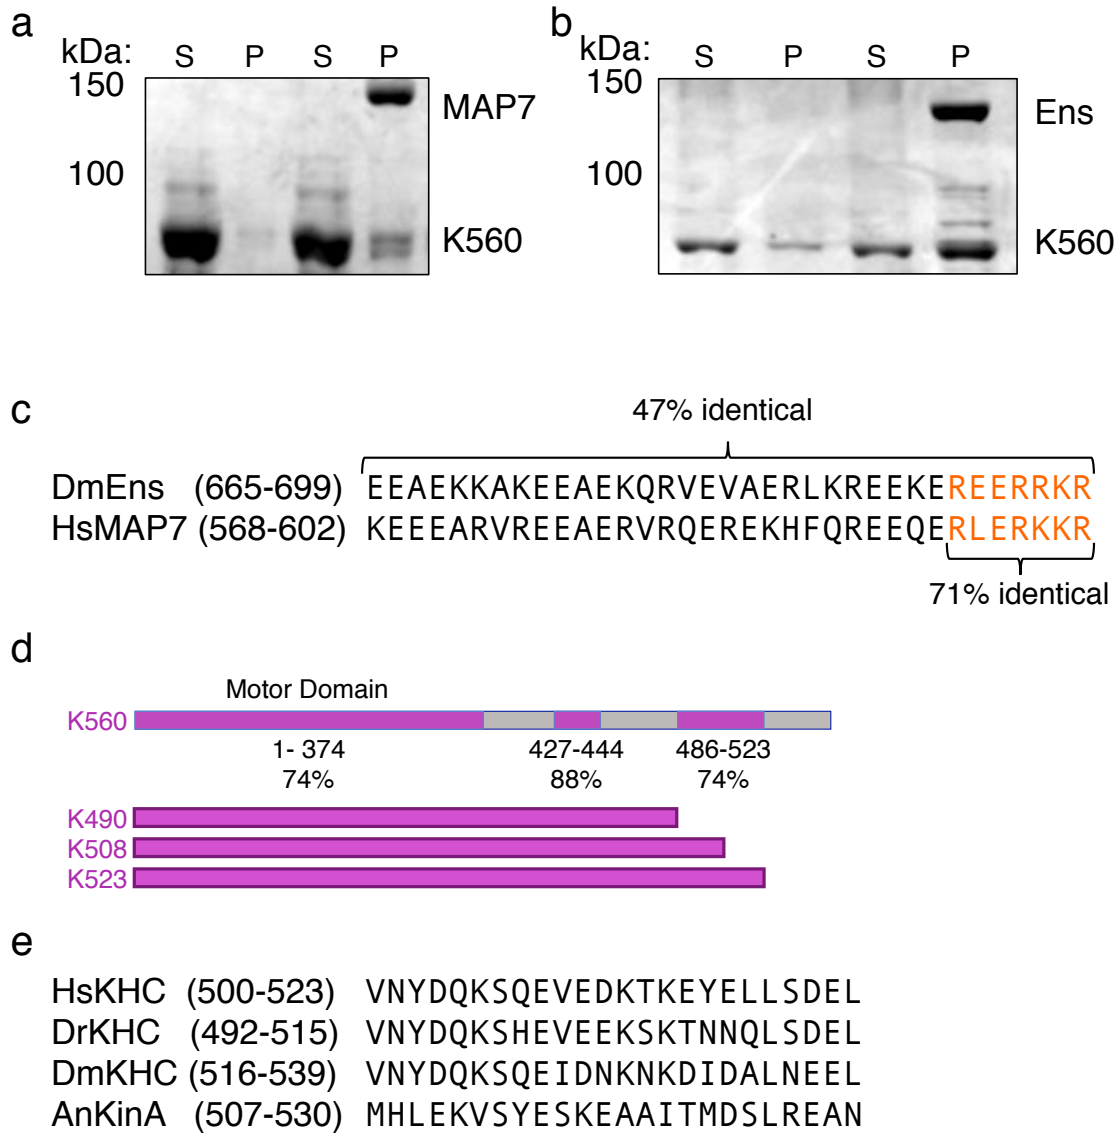

**Supplementary Figure 3. Dissection of the MAP7/ensconsin interaction with kinesin-**

**1.**

**(a-b)** Coomassie Blue-stained SDS-PAGE gels of FLAG pull-downs with purified recombinant proteins. Either full-length sfGFP-MAP7-FLAG **(c)** or sfGFP-Ensconsin-FLAG were used for pull-down assays with K560-mScarlet (n = two independent trials per assay). S = supernatant and P = pellet. **(c)** Sequence alignment between *Drosophila melanogaster* ensconsin (DmEns) and *Homo sapiens* MAP7 (HsMAP7) with the percent

identity indicated. **(d)** Schematic diagram of K560 and the associated constructs used in the mapping studies of Fig. 4i-j. The percent identities indicate the conservation between DmEns and HsMAP7. **(e)** Sequence alignment between HsKHC, *Danio rerio* KHC (DrKHC), DmKHC, and *Aspergillus nidulans* KinA (AnKinA).

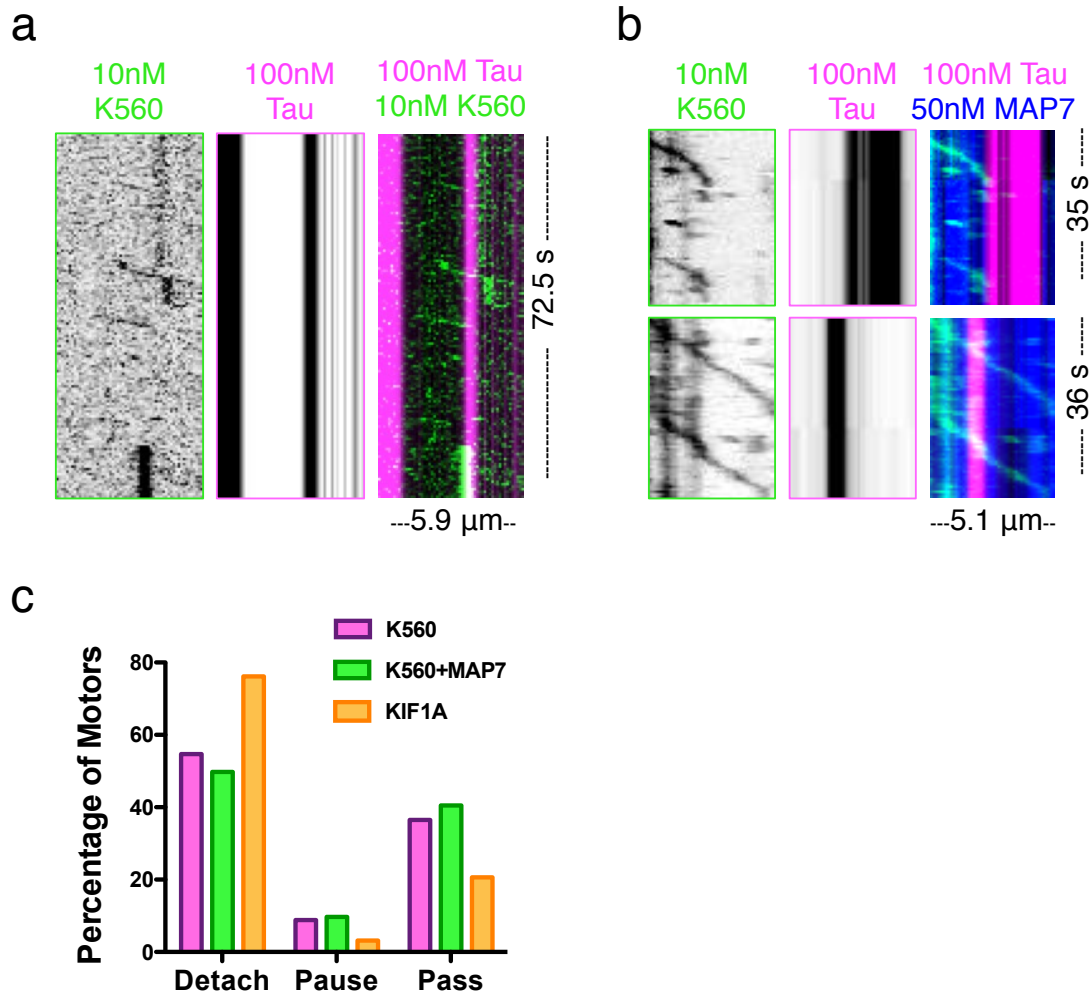

**Supplementary Figure 4. The effects of tau on kinesin-1 in the absence and presence of MAP7.**

**(a-b)** Kymographs depicting the effect of 100 nM mTagBFP-tau (pink) on 10 nM K560-mScarlet (green) motility in the absence **(a)** or presence **(b)** of 50 nM sfGFP-MAP7

(blue). **(c)** Quantification of the percent of K560 motors that detach, pause, or pass tau patches in the absence (pink) or presence (green) of MAP7 (54.7 % vs. 49.8 % detach, 8.8 % vs. 9.7 % pause, and 36.5 % vs. 40.5 % pass for K560 alone vs. K560 + MAP7, respectively; n = 159 from two independent experiments and 227 events from three

independent experiments for K560 alone vs. K560 + MAP7, respectively). Related to Fig.

5d, also shown is the quantification of percent of KIF1A motors (orange) that detach, pause, or pass tau patches (76.2 % detach, 3.2 % pause, and 20.6 % pass; n = 126 motors from two independent experiments).



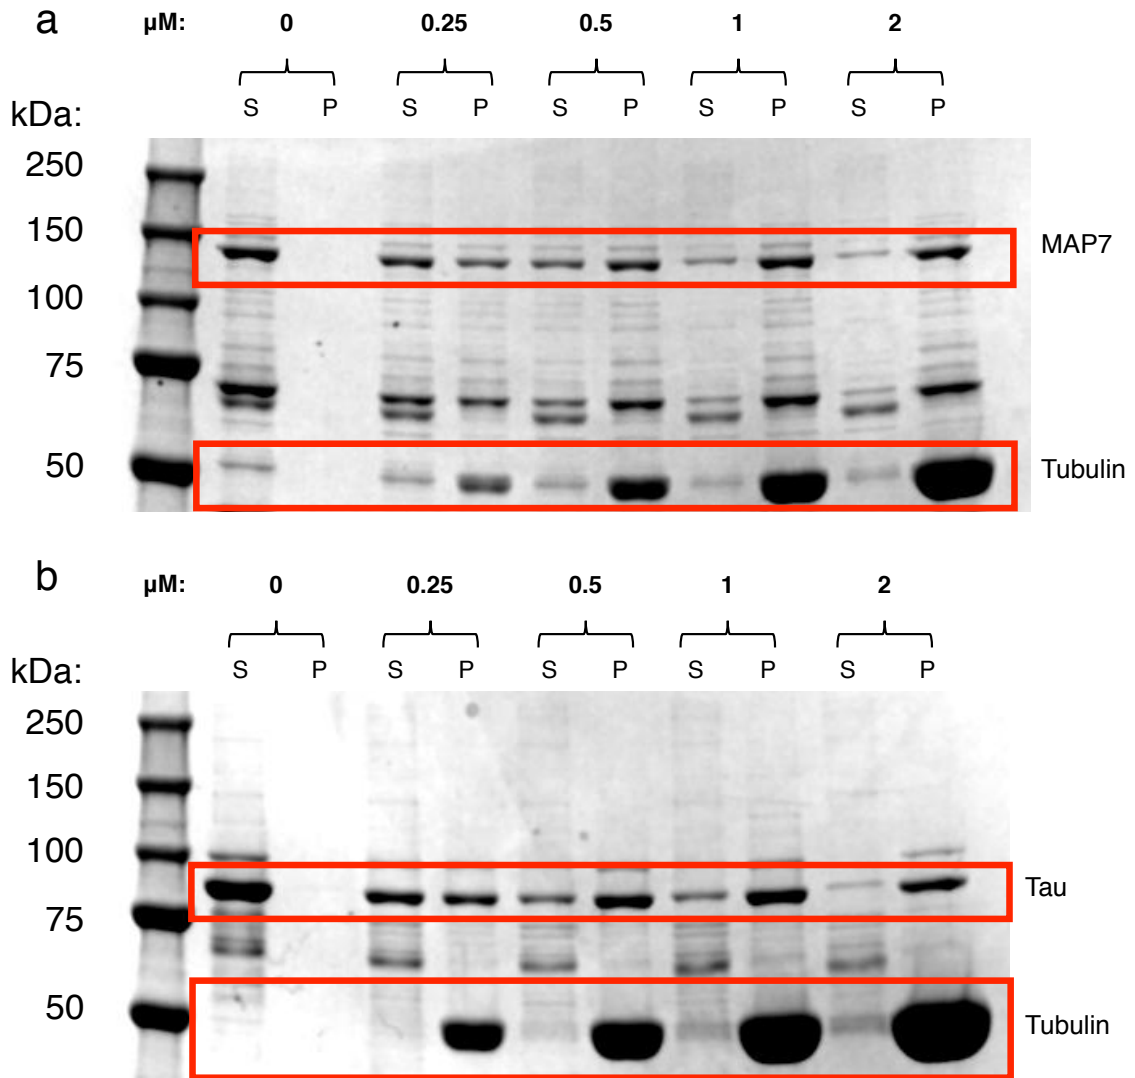

**Supplementary Figure 5. Uncropped images of SDS-PAGE gels shown in Figure 2i for MAP7 (a) and tau (b) microtubule co-pelleting assays. Red boxes highlight the portions of the gels that are shown in the figure. Ladder is shown on the left.**
